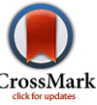

## Correction

# Correction: Characterizing Alzheimer's Disease Severity via Resting-Awake EEG Amplitude Modulation Analysis

The *PLOS ONE* Staff

## Notice of Republication

This article was republished on June 6, 2014, to correct missing text in the article. The publisher apologizes for the error. Please download this article again to view the correct version. The originally published, uncorrected article and the republished, corrected article are provided here for reference.

## Supporting Information

**File S1.** Originally published, uncorrected article.  
(PDF)

**File S2.** Republished, corrected article.  
(PDF)

## Reference

1. Fraga EJ, Falk TH, Kanda PAM, Anghinah R (2013) Characterizing Alzheimer's Disease Severity via Resting-Awake EEG Amplitude Modulation Analysis. *PLoS ONE* 8(8): e72240. doi:10.1371/journal.pone.0072240

---

**Citation:** The *PLOS ONE* Staff (2014) Correction: Characterizing Alzheimer's Disease Severity via Resting-Awake EEG Amplitude Modulation Analysis. *PLoS ONE* 9(6): e101613. doi:10.1371/journal.pone.0101613

**Published:** June 24, 2014

**Copyright:** © 2014 The *PLOS ONE* Staff. This is an open-access article distributed under the terms of the Creative Commons Attribution License, which permits unrestricted use, distribution, and reproduction in any medium, provided the original author and source are credited.
